# Supplementary material
Source: PubMed Central journal article supplement (PMC7765734)
Supplement: NIHMS1607665-supplement-1.pdf [file NIHMS1607665-supplement-1.pdf]

## Supplementary Figure 1. Cohort Derivation – Long-Stay Nursing Home Residents

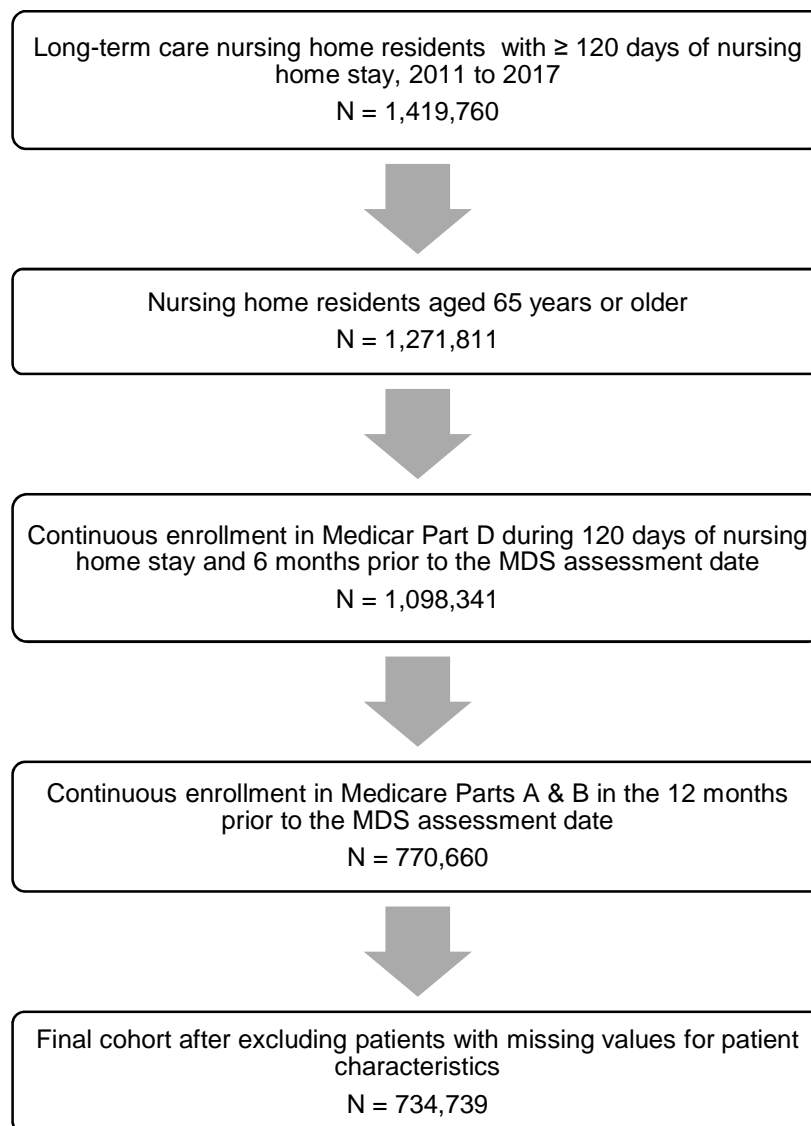

**Supplementary Figure 2. Cohort Derivation – Nursing Home Residents with an Emergency Room Visit for a Fracture**

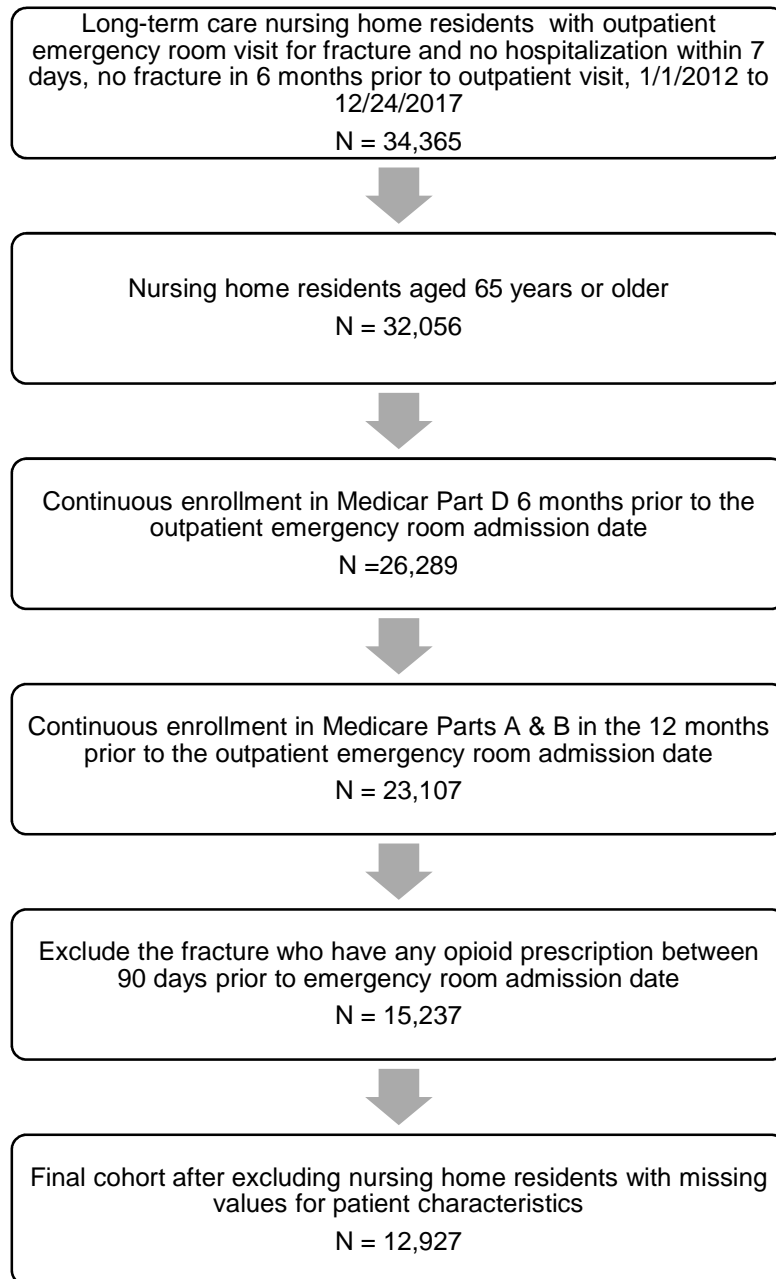

**Supplementary Figure 3. Trends in Opioid Use by Dementia Severity in Long-term Care Nursing Home Residents with an Emergency Room Visit for a Fracture**

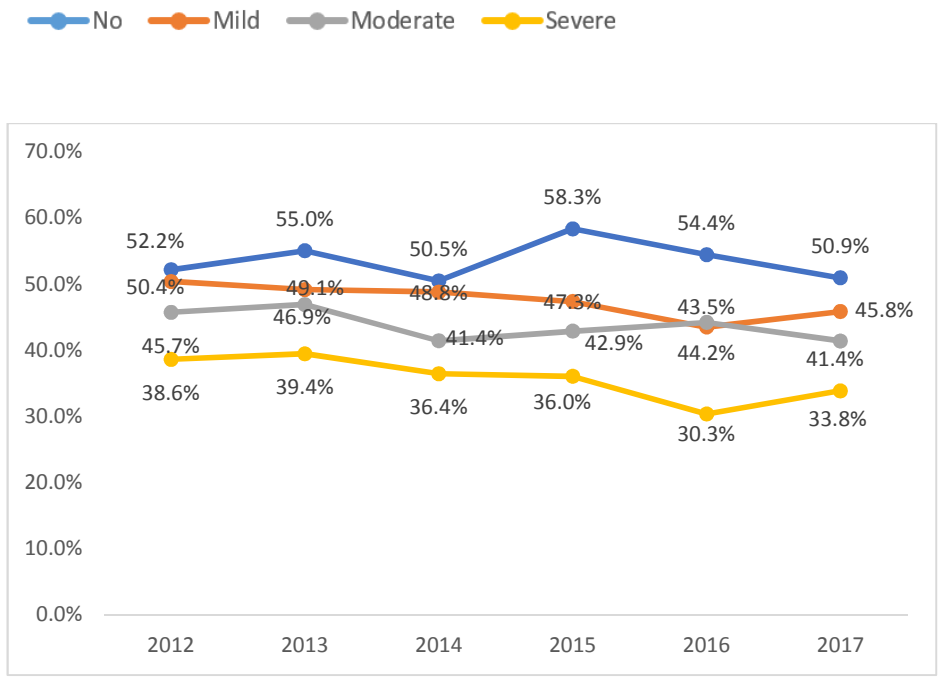

P value for trends from Cochran-Armitage trends test: no 0.7871; mild 0.0454; moderate 0.0317; severe 0.0150
